# Supplementary material for: Single-Walled Carbon Nanohorns as Boosting Surface for the Analysis of Low-Molecular-Weight Compounds by SALDI-MS
Source: MDPI journal article supplement (doi:10.3390/ijms23095027), 2022-04-30
Supplement: s1 [file s1]

## **Single-walled carbon nanohorns as boosting surface for the analysis of low-molecular weight compounds by SALDI-MS**

Marco Roverso<sup>1\*</sup>, Roberta Seraglia<sup>2</sup>, Raghav Dogra<sup>1</sup>, Denis Badocco<sup>1</sup>, Silvia Pettenuzzo<sup>1,3</sup>, Luca Cappellin<sup>1</sup>, Paolo Pastore<sup>1</sup>, Sara Bogialli<sup>1</sup>.

1. Department of Chemical Sciences, University of Padova, Padova, Italy
2. Institute of Condensed Matter Chemistry and Technologies for Energy (ICMATE), National Research Council-CNR, Padova, Italy
3. Center Agriculture Food Environment (C3A), University of Trento, San Michele all'Adige, Italy

Corresponding Author:

Marco Roverso

Department of Chemical Sciences, University of Padova

Via Marzolo, 1

IT35131 Padova, Italy

marco.roverso@unipd.it

Phone: +39 049 8275181

## **Supplementary Material**

Table S1: Ionic species identified in the analysis of a water solution of glycine and phenylalanine (1 mg/mL each) by SALDI-MS. Spectra reported in Figure 2. Mass accuracy: <150 ppm.

| Detected Species | Glycine (Figure 2, panel A) | Phenylalanine (Figure 2, panel B) |
|------------------|-----------------------------|-----------------------------------|
| $[M+H]^+$        | Not detected                | 166.090                           |
| $[M+Na]^+$       | 98.023                      | 188.085                           |
| $[M+K]^+$        | 114.009                     | 204.075                           |
| $[M-H+2Na]^+$    | 120.005                     | 210.055                           |
| $[M-H+Na+K]^+$   | 135.984                     | 226.033                           |
| $[M-H+2K]^+$     | 151.962                     | 242.007                           |

## SWCNH surface preparation

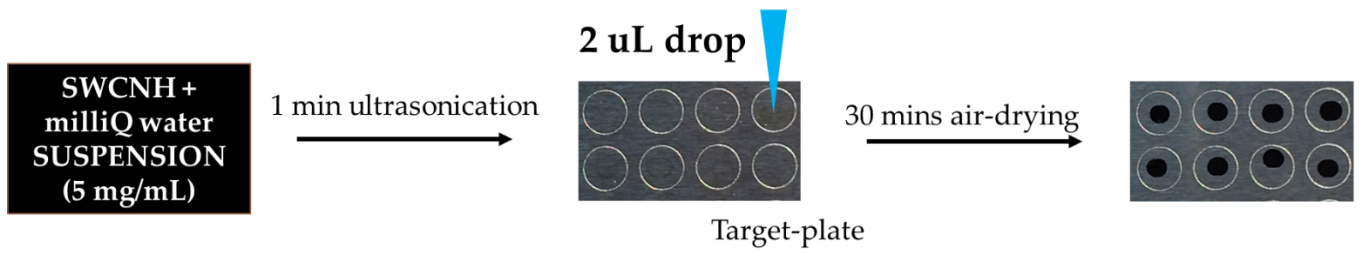

## Sample deposition

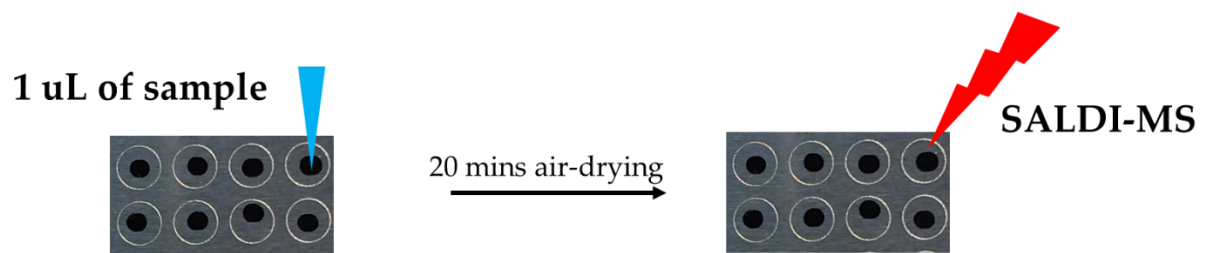

Figure S1: Schematic representation of the optimized procedure for the preparation of the SWCNH-based surface and sample deposition.
